## UCPC for optimal cross selection

# Improving short and long term genetic gain by accounting for within family variance in optimal cross selection

Antoine Allier<sup>1,2\*</sup>, Christina Lehermeier<sup>2</sup>, Alain Charcosset<sup>1</sup>, Laurence Moreau<sup>1</sup>, Simon Teyssède<sup>2</sup>

<sup>1</sup> GQE - Le Moulon, INRA, Univ. Paris-Sud, CNRS, AgroParisTech, Université Paris-Saclay, 91190 Gif-sur-Yvette, France

<sup>2</sup> RAGT2n, Genetics and Analytics Unit, 12510 Druelle, France

\* **Correspondence:** Antoine Allier (antoine.allier@inra.fr)

**Keywords:** genomic prediction; optimal cross selection; usefulness criterion; parental contributions; genetic diversity; Bulmer effect

## UCPC for optimal cross selection

### Abstract

The implementation of genomic selection in recurrent breeding programs raised several concerns, especially that a higher inbreeding rate could compromise the long term genetic gain. An optimized mating strategy that maximizes the performance in progeny and maintains diversity for long term genetic gain on current and yet unknown future targets is essential. The optimal cross selection approach aims at identifying the optimal set of crosses maximizing the expected genetic value in the progeny under a constraint on diversity in the progeny. Usually, optimal cross selection does not account for within family selection, i.e. the fact that only a selected fraction of each family serves as candidate parents of the next generation. In this study, we consider within family variance accounting for linkage disequilibrium between quantitative trait loci to predict the expected mean performance and the expected genetic diversity in the selected progeny of a set of crosses. These predictions rely on the method called usefulness criterion parental contribution (UCPC). We compared UCPC based optimal cross selection and optimal cross selection in a long term simulated recurrent genomic selection breeding program considering overlapping generations. UCPC based optimal cross selection proved to be more efficient to convert the genetic diversity into short and long term genetic gains than optimal cross selection. We also showed that using the UCPC based optimal cross selection, the long term genetic gain can be increased with only limited reduction of the short term commercial genetic gain.

## **INTRODUCTION**

1           Successful breeding requires strategies that balance immediate genetic gain with population  
2           diversity to sustain long term progress (Jannink 2010). At each selection cycle, plant breeders are facing  
3           the choice of new parental lines and the way in which these are mated to improve the mean population  
4           performance and generate the genetic variation on which selection will act. Although breeders attempt  
5           to account for all available information on candidates, some crosses do not yield selected progeny and  
6           do not contribute to genetic gain (Heslot *et al.* 2015). As breeding programs from different companies  
7           compete for short term gain, breeders tend to use intensively the most performant individuals sometimes  
8           at the expense of genetic diversity (Rauf *et al.* 2010; Gerke *et al.* 2015; Allier *et al.* 2019a). The  
9           identification of the crossing plan that maximizes the performance in progeny and limits diversity  
10          reduction for long term genetic gain is essential.

11          Historically, breeders selected the best individuals based on phenotypic observations as a proxy  
12          of their breeding value, i.e. the expected value of their progeny. In order to better estimate the breeding  
13          value of individuals, phenotypic selection has been complemented by pedigree based prediction of  
14          breeding values (Henderson 1984; Piepho *et al.* 2008) and more recently, with cheap high density  
15          genotyping becoming available, by genomic prediction of breeding values (Meuwissen *et al.* 2001). In  
16          genomic selection (GS), a model calibrated on phenotype and genotype information of a training  
17          population is used to predict genomic estimated breeding values (GEBVs) from genome-wide marker  
18          information. A truncation selection is commonly applied on GEBVs and the selected individuals are  
19          intercrossed to create the next generation. One of the interests of GS is attributed to the acceleration of  
20          selection progress by shortening generation interval, increasing selection intensity and accuracy (Hayes  
21          *et al.* 2010; Daetwyler *et al.* 2013; Heslot *et al.* 2015). As a consequence, compared to phenotypic  
22          selection, GS is expected to accelerate the loss of genetic diversity due to the rapid fixation of large  
23          effect regions, but also likely due to the higher probability to select the closest individuals to the training  
24          population that are more accurately predicted (Clark *et al.* 2011; Pszczola *et al.* 2012). As a result, it has  
25          been shown in an experimental study (Rutkoski *et al.* 2015) and by stochastic simulations (Jannink 2010;  
26          Lin *et al.* 2016) that GS increases the loss of diversity compared to phenotypic selection. Thus, the

## UCPC for optimal cross selection

27 optimization of mating strategies in GS breeding programs is a critical area of theoretical and applied  
28 research.

29 Several approaches have been suggested to balance the short and long term genetic gain while  
30 selecting crosses using GS. In line with Kinghorn (2011), Pryce et al. (2012), and Akdemir and Sánchez  
31 (2016), the selection of a set of crosses, e.g. a list of biparental crosses, requires two components: (i) a  
32 cross selection index (CSI) that measures the interest of a set of crosses and (ii) an algorithm to find the  
33 set of crosses that maximizes the CSI.

34 The CSI may consider crosses individually, i.e. the interest of a cross does not depend on the  
35 other crosses in the selected set. In classical recurrent GS, candidates with the highest GEBVs are  
36 selected and inter-crossed to maximize the expected progeny mean in the next generation. In this case,  
37 the CSI is simply the mean of parental GEBVs. However, such an approach neither maximizes the  
38 expected response to selection in the progeny, which involves genetic variance generated by Mendelian  
39 segregation within each family, nor the long term genetic gain. Alternative measures of the interest of a  
40 cross have been suggested to account for parent complementarity, i.e. within cross variability and  
41 expected response to selection. Daetwyler et al. (2015) proposed the optimal haploid value (OHV) that  
42 accounts for the complementarity between parents of a cross on predefined haplotype segments. Using  
43 stochastic simulations, the authors observed that OHV selection yielded higher long term genetic gain  
44 and preserved greater amount of genetic diversity than truncated GS. However, OHV does neither  
45 account for the position of quantitative trait loci (QTLs) nor the linkage disequilibrium between QTLs  
46 (Lehermeier *et al.* 2017b; Müller *et al.* 2018). Schnell and Utz (1975) proposed the usefulness criterion  
47 (UC) of a cross to evaluate the expected response to selection in the progeny of the cross. The UC of a  
48 cross accounts for the progeny mean ( $\mu$ ) that is the mean of parental GEBVs and the progeny standard  
49 deviation ( $\sigma$ ), the selection intensity ( $i$ ) and the selection accuracy ( $h$ ):  $UC = \mu + i h \sigma$ . Zhong and  
50 Jannink (2007) proposed to predict progeny variance using estimated QTL effects accounting for linkage  
51 between loci. Genome-wide marker effects and computationally intensive stochastic simulations of  
52 progeny have also been considered to predict the progeny variance (e.g. Mohammadi *et al.* 2015).  
53 Recently, an unbiased predictor of progeny variance ( $\sigma^2$ ) has been derived in Lehermeier et al. (2017b)  
54 for two-way crosses and extended in Allier et al. (2019b) for multi-parental crosses implying up to four

## UCPC for optimal cross selection

55 parents. Lehermeier et al. (2017b) observed that using UC as a cross selection index increased the short  
56 term genetic gain compared to evaluate crosses based on OHV or mean parental GEBV. Similar results  
57 have been obtained by simulations in Müller et al. (2018) considering the expected maximum haploid  
58 breeding value (EMBV) that is akin to the UC for normally distributed and fully additive traits.

59 Alternatively, one can consider a more holistic CSI that accounts for the interdependence of  
60 crosses in the sense that the interest of a cross depends on the other selected crosses. This is the case in  
61 optimal contribution selection, where a set of candidate parents is evaluated as a whole regarding the  
62 expected short term gain and the associated risk on losing long term gain. Optimal contribution  
63 selection aims at identifying the optimal contributions ( $\mathbf{c}$ ) of candidate parents to the next generation  
64 obtained by random mating, in order to maximize the expected genetic value in the progeny ( $V$ ) under  
65 a certain constraint on inbreeding ( $D$ ) (Wray and Goddard 1994; Meuwissen 1997; Woolliams *et al.*  
66 2015). Optimal cross selection, further referred as OCS, is an extension of the optimal contribution  
67 selection to deliver a crossing plan that maximizes  $V$  under the constraint  $D$  by considering additional  
68 constraints on the allocation of mates in crosses (Kinghorn *et al.* 2009; Kinghorn 2011; Akdemir and  
69 Sánchez 2016; Gorjanc *et al.* 2018; Akdemir *et al.* 2018). In the era of genomic selection, the expected  
70 genetic value in progeny ( $V$ ) to be maximized is defined as the mean of parental GEBV ( $\mathbf{a}$ ) weighted  
71 by parental contributions  $\mathbf{c}$ , i.e.  $\mathbf{c}'\mathbf{a}$ , and the constraint on inbreeding ( $D$ ) to be minimized is  $\mathbf{c}'\mathbf{K}\mathbf{c}$  with  
72  $\mathbf{K}$  a genomic coancestry matrix. To obtain optimal solutions for the vector of contributions  $\mathbf{c}$  and the  
73 crossing plan, i.e. pairing of candidates, differential evolutionary algorithms have been suggested (Storn  
74 and Price 1997; Kinghorn *et al.* 2009; Kinghorn 2011). Using the concept of optimal contribution  
75 selection for mating decisions is common in animal breeding (Woolliams *et al.* 2015) and is increasingly  
76 adopted in plant breeding (Akdemir and Sánchez 2016; De Beukelaer *et al.* 2017; Lin *et al.* 2017;  
77 Gorjanc *et al.* 2018; Akdemir *et al.* 2018).

78 In plant breeding one typically has larger biparental families than in animal breeding and  
79 especially with GS, the selection intensity within family can be largely increased so that plant breeders  
80 much more capitalize on the segregation variance within families compared to animal breeders. In  
81 previous works, the genetic gain ( $V$ ) and constraint ( $D$ ) have been defined at the level of the progeny  
82 before within family selection. Exceptions are represented by the work of Shepherd and Kinghorn

## UCPC for optimal cross selection

83 (1998) and Akdemir et al. (2016; 2018) who added a term to  $V$  accounting for within cross variance  
84 assuming LE between QTLs. However, to our knowledge no previous study allowed for linkage  
85 disequilibrium (LD) between QTLs. Furthermore, as observed in historical wheat data (Fradgley *et al.*  
86 2019) and using simulations in a maize context (Allier *et al.* 2019b), within family selection also affects  
87 the effective contribution of parents to the next generation. This likely biases the prediction of  
88 inbreeding/diversity in the next generation, which to our knowledge has not been considered in previous  
89 studies.

90 In this study, we suggest to adjust  $V$  and  $D$  terms so that within family selection and the fact that  
91 only the best progeny of each family serve as candidates for the next generation are taken into account.  
92 We propose to use the usefulness criterion parental contribution (UCPC) approach (Allier *et al.* 2019b)  
93 that enables to predict the expected mean performance of the selected fraction of progeny, and to predict  
94 the contribution of parents to the selected fraction of progeny. We compared our OCS strategy based on  
95 UCPC to account for within family selection with other cross selection strategies, in a long term  
96 simulated recurrent genomic selection breeding program involving overlapping generations (Fig. 1A).  
97 Our objectives were to demonstrate (1) the interest of UCPC to predict the genetic diversity in the  
98 selected fraction of progeny and (2) the interest of accounting for within family selection in OCS for  
99 both, short and long term genetic gains.

## UCPC for optimal cross selection

### MATERIAL AND METHODS

#### 100 **Simulated breeding program**

##### 101 *Breeding program*

102 We simulated a breeding program to compare the effect of different cross selection indices (CSI)  
103 on short and long term genetic gain in a realistic breeding context considering overlapping and  
104 connected generations (i.e. cohorts) of three years (Fig. 1A). A detailed description of the simulated  
105 breeding program and the material is provided in Supplementary Material (File S1).

106 Each simulation replicate started from a population of 40 founders sampled among 57 Iodent  
107 maize genotypes from the Amaizing project (Rio *et al.* 2019; Allier *et al.* 2019b). We sampled 1,000  
108 biallelic QTLs among 40,478 high-quality single nucleotide polymorphisms (SNPs) from the Illumina  
109 MaizeSNP50 BeadChip (Ganal *et al.* 2011) with consensus genetic positions (Giraud *et al.* 2014). The  
110 sampling process obeyed two constrains: a QTL minor allele frequency  $\geq 0.2$  and a distance between  
111 two consecutive QTLs  $\geq 0.2$  cM. Each QTL was assigned an additive effect sampled from a Gaussian  
112 distribution with a mean of zero and a variance of 0.05 and the favorable allele was attributed at random  
113 to one of the two SNP alleles. We initiated a virtual breeding program starting from the founder  
114 genotypes with a burn-in period of 20 years that mimicked recurrent phenotypic selection using doubled  
115 haploid (DH) technology. At each generation, phenotypes were simulated considering an error variance  
116 corresponding to a trait repeatability of 0.4 in the founder population and no genotype by environment  
117 interactions. For phenotyping, every individual was evaluated in four environments in one year. After  
118 20 years of burn-in, we compared different cross selection indices (CSI) for 60 years of recurrent  
119 genomic selection using DH technology. Each year, a cohort  $T$  was generated by 20 two-way crosses  
120 ( $|nc| = 20$ ) of 80 DH progeny each ( $nProg = 80$ ). We assumed that three years were needed to  
121 produce DH from two-way crosses, and to genotype and phenotype them. Candidate parents of cohort  
122  $T$  were selected from the available DH of the three cohorts:  $T - 3$ ,  $T - 4$  and  $T - 5$  (Fig. 1A-B). Per  
123 family, the 4 DH lines (i.e. 5%) with the largest breeding values, detailed in “Evaluation scenario”  
124 section, were considered as potential parents, yielding 4 DH lines/family x 20 families/cohort x 3 cohorts  
125 = 240 potential parents. Considering these  $N = 240$  parents,  $N(N - 1)/2 = 28,840$  two-way crosses  
126 are possible. The set of  $|nc| = 20$  two-way crosses among these 28,680 candidate crosses was defined

## UCPC for optimal cross selection

127 using different CSI detailed in the following sections. This simulated scheme yielded overlapping and  
128 connected cohorts as it is standard in practical plant breeding (Fig. 1A). Note that 60 years post burn-in  
129 corresponded in the simulated context to 20 equivalent non-overlapping generations.

### 130 *Evaluation scenarios*

131 We considered different scenarios for genome-wide marker effects and progeny evaluation. In  
132 order to compare several CSI and not blur the comparison between CSI with the uncertainty in marker  
133 effect estimates, we mainly focused on the use of the 1,000 known QTL effects and positions (referred  
134 to as TRUE scenario). For a representative subset of the CSI, we also considered a more realistic scenario  
135 where the effects of 2,000 randomly sampled non causal SNPs were obtained from a G-BLUP model  
136 with back solving (Wang *et al.* 2012). This scenario was referred to as GS and marker effects used to  
137 predict the CSI were estimated every year with all candidate parents that were phenotyped and  
138 genotyped. The progeny were selected on their genomic estimated breeding values (GEBV) considering  
139 their phenotypes and genotypes at non causal SNPs. As a benchmark we also considered a phenotypic  
140 selection scenario where progeny were selected based on their phenotypic mean (PS). For details on the  
141 evaluation models see File S1.

### 142 **Cross selection strategies**

#### 143 *Optimal cross selection not accounting for within family selection*

144 Considering  $N$  homozygote candidate parents,  $N(N - 1)/2$  two-way crosses are possible. We  
145 define a crossing plan  $\mathbf{nc}$  as a set of  $|\mathbf{nc}|$  crosses out of possible two-way crosses, giving the index of  
146 selected crosses, i.e. with the  $i^{th}$  element  $nc(i) \in [1, N(N - 1)/2]$ . The  $(N \times 1)$ -dimensional vector of  
147 candidate parents contributions  $\mathbf{c}$  is defined as:

$$148 \quad \mathbf{c} = \frac{1}{|\mathbf{nc}|} (\mathbf{Z}_1 \mathbf{c}_1 + \mathbf{Z}_2 \mathbf{c}_2), \text{ [Eq. 1]}$$

149 where  $\mathbf{Z}_1$  (respectively  $\mathbf{Z}_2$ ) is a  $(N \times |\mathbf{nc}|)$ - dimensional design matrix that links each  $N$  candidate parent  
150 to the first (respectively second) parent in the set of crosses  $\mathbf{nc}$ ,  $\mathbf{c}_1$  (respectively  $\mathbf{c}_2$ ) is a  $(|\mathbf{nc}| \times 1)$ -  
151 dimensional vector containing the contributions of the first (respectively second) parent to progeny, i.e.  
152 a vector of 0.5 when assuming no selection within crosses.



## UCPC for optimal cross selection

153 The  $(N \times 1)$ -dimensional vector of candidate parents true breeding values is  $\mathbf{a} = \mathbf{X}\boldsymbol{\beta}_T$ , where  
 154  $\mathbf{X} = (\mathbf{x}_1, \dots, \mathbf{x}_N)'$  is the  $(N \times m)$ -dimensional matrix of known parental genotypes at  $m$  biallelic QTLs,  
 155 where  $\mathbf{x}_p$  denotes the  $(m \times 1)$ -dimensional genotype vector of parent  $p \in [1, N]$ , with the  $j^{\text{th}}$  element  
 156 coded as 1 or -1 for the genotypes AA or aa at QTL  $j$ .  $\boldsymbol{\beta}_T$  is the  $(m \times 1)$ -dimensional vector of known  
 157 additive QTL effects for the quantitative agronomic performance trait considered. The genetic gain  
 158  $V(\mathbf{nc})$  for this set of two-way crosses is defined as the expected mean performance in the DH progeny:

$$159 \quad V(\mathbf{nc}) = \mathbf{c}'\mathbf{a}. \text{ [Eq. 2]}$$

160 We define the constraint on diversity ( $D$ ) as the mean expected genetic diversity in DH progeny (He,  
 161 Nei 1973):

$$162 \quad D(\mathbf{nc}) = 1 - \mathbf{c}'\mathbf{K}\mathbf{c}, \text{ [Eq. 3]}$$

163 where  $\mathbf{K} = \frac{1}{2} \left( \frac{1}{m} \mathbf{X}\mathbf{X}' + \mathbf{1} \right)$  is the  $(N \times N)$ -dimensional identity by state (IBS) coancestry matrix between  
 164 the  $N$  candidates. File S2 details the relationship between the IBS coancestry among parents ( $\mathbf{K}$ ), the  
 165 parental contributions to progeny ( $\mathbf{c}$ ) and the mean expected heterozygosity in progeny  $He =$   
 166  $\frac{1}{m} \sum_{j=1}^m 2p_j(1 - p_j)$  where  $p_j$  is the frequency of the genotypes AA at QTL  $j$  in the progeny.

### 167 *Accounting for within family selection in OCS*

168 In the OCS, as just defined and also considered in Gorjanc et al. (2018), the progeny derived  
 169 from the  $\mathbf{nc}$  crosses are all expected to contribute to the next generation. We suggest to consider  $V(\mathbf{nc})$   
 170 and  $D(\mathbf{nc})$  terms accounting for the fact that only a selected fraction of each family will be candidate  
 171 for the next generation (e.g. 5% per family in our simulation study). For this, we apply the UCPC  
 172 approach proposed by Allier et al. (2019b) for two-way crosses and extend its use to evaluate the interest  
 173 of a set  $\mathbf{nc}$  of two-way crosses after selection in progeny.

### 174 *UCPC for two-way crosses*

175 Two inbred lines  $P_1$  and  $P_2$  are considered as parental lines for a candidate cross  $P_1 \times P_2$  and  
 176  $(\mathbf{x}_1, \mathbf{x}_2)'$  denotes their genotyping matrix. Following Lehermeier et al. (2017b), the DH progeny mean  
 177 and progeny variance for the performance trait in the progeny before selection can be computed as:

$$178 \quad \mu_T = 0.5 (\mathbf{x}'_1 \boldsymbol{\beta}_T + \mathbf{x}'_2 \boldsymbol{\beta}_T), \text{ [Eq. 4a]}$$

$$179 \quad \sigma_T^2 = \boldsymbol{\beta}'_T \boldsymbol{\Sigma} \boldsymbol{\beta}_T, \text{ [Eq. 4b]}$$

## UCPC for optimal cross selection

180 where  $\mathbf{x}_1$ ,  $\mathbf{x}_2$  and  $\boldsymbol{\beta}_T$  were defined previously and  $\boldsymbol{\Sigma}$  is the  $(m \times m)$ -dimensional variance covariance  
 181 matrix of QTL genotypes in DH progeny defined in Lehermeier et al. (2017b).

182 To follow parental contributions, we consider  $P_1$  parental contribution as a normally distributed  
 183 trait (Allier et al. 2019b). As we only consider two-way crosses and biallelic QTLs, we can simplify for  
 184 computational reasons the formulas by using identity by state (IBS) parental contributions computed for  
 185 polymorphic QTLs between  $P_1$  and  $P_2$  instead of using identity by descent (IBD) parental contributions  
 186 (Allier et al. 2019b). We define the  $(m \times 1)$ -dimensional vector  $\boldsymbol{\beta}_{C1}$  to follow  $P_1$  IBS genome  
 187 contribution at QTLs as  $\boldsymbol{\beta}_{C1} = \frac{\mathbf{x}_1 - \mathbf{x}_2}{(\mathbf{x}_1 - \mathbf{x}_2)'(\mathbf{x}_1 - \mathbf{x}_2)}$ . We compute the  $P_1$  mean contribution in the progeny  
 188 before selection  $\mu_{C1} = 0.5 (\mathbf{x}'_1 \boldsymbol{\beta}_{C1} + \mathbf{x}'_2 \boldsymbol{\beta}_{C1} + 1)$ , where  $\mathbf{x}'_p \boldsymbol{\beta}_{C1} + 0.5$  is the contribution of  $P_1$  to  
 189 parent  $p$ . The progeny variance  $\sigma_{C1}^2$  for the  $P_1$  contribution trait in the progeny before selection is  
 190 computed using Eq. 4b by replacing  $\boldsymbol{\beta}_T$  by  $\boldsymbol{\beta}_{C1}$ . The progeny mean for  $P_2$  contribution is then defined  
 191 as  $\mu_{C2} = 1 - \mu_{C1}$ .

192 Following Allier et al. (2019b), we compute the covariance between the performance trait and  $P_1$   
 193 contribution trait in progeny as:

$$194 \quad \sigma_{T,C1} = \boldsymbol{\beta}'_T \boldsymbol{\Sigma} \boldsymbol{\beta}_{C1}. \text{ [Eq. 5]}$$

195 The expected mean performance of the selected fraction of progeny, i.e. usefulness criterion (Schnell  
 196 and Utz 1975), of the cross  $P_1 \times P_2$  is:

$$197 \quad UC^{(i)} = \mu_T + ih\sigma_T, \text{ [Eq. 6]}$$

198 where  $i$  is the within family selection intensity and the exponent  $(i)$  in  $UC^{(i)}$  expresses the dependency  
 199 of  $UC$  on the selection intensity  $i$ . We considered a selection accuracy  $h = 1$  as in Zhong and Jannink  
 200 (2007), which holds when selecting on true breeding values. The correlated responses to selection on  $P_1$   
 201 and  $P_2$  genome contributions in the selected fraction of progeny are (Falconer and Mackay 1996):

$$202 \quad c_1^{(i)} = \mu_{C1} + i \frac{\sigma_{T,C1}}{\sigma_T} \text{ and } c_2^{(i)} = 1 - c_1^{(i)}. \text{ [Eq. 7]}$$

203 *Cross selection based on UCPC*

204 Accounting for within family selection intensity  $i$ , the genetic gain term  $V^{(i)}(\mathbf{nc})$  for a set of  
 205 two-way crosses  $\mathbf{nc}$  is defined as the expected performance in the selected fraction of progeny:

## UCPC for optimal cross selection

206 
$$V^{(i)}(\mathbf{nc}) = \frac{1}{|\mathbf{nc}|} \sum_{j \in \mathbf{nc}} UC^{(i)}(j). \text{ [Eq. 8]}$$

207 The constraint on diversity  $D^{(i)}(\mathbf{nc})$  in the selected progeny is defined as:

208 
$$D^{(i)}(\mathbf{nc}) = 1 - \mathbf{c}^{(i)'} \mathbf{K} \mathbf{c}^{(i)}, \text{ [Eq. 9]}$$

209 where  $\mathbf{c}^{(i)}$  is defined like  $\mathbf{c}$  in Eq. 1 but accounting for within family selection by replacing the ante-  
 210 selection parental contributions  $\mathbf{c}_1$  and  $\mathbf{c}_2$  by the post-selection parental contributions  $\mathbf{c}_1^{(i)}$  and  $\mathbf{c}_2^{(i)}$  (Eq.  
 211 7), respectively. Note that considering the absence of selection in progeny, i.e.  $i = 0$ , yields  $V^{(i=0)}(\mathbf{nc})$   
 212 being the mean of parent breeding values (Eq. 2) and  $D^{(i=0)}(\mathbf{nc})$  the expected diversity in progeny  
 213 before selection (Eq. 3), which is equivalent to optimal cross selection as suggested by Gorjanc *et al.*  
 214 (2018). The R code (R Core Team 2017) to evaluate a set of crosses as presented in the UCPC based  
 215 optimal cross selection is provided in File S3.

### 216 **Multi-objective optimization framework**

217 In practice one does not evaluate only one set of crosses but several ones in order to find the  
 218 optimal set of crosses to reach a specified target that is a function of  $V^{(i)}(\mathbf{nc})$  and  $D^{(i)}(\mathbf{nc})$ . We use the  
 219  $\epsilon$ -constraint method (Haimes *et al.* 1971; Gorjanc and Hickey 2018) to solve the multi-objective  
 220 optimization problem:

221 
$$\max_{\mathbf{nc}} V^{(i)}(\mathbf{nc})$$
  
 222 with  $D^{(i)}(\mathbf{nc}) \geq He(t), \text{ [Eq. 10]}$

223 where  $He(t), \forall t \in [0, t^*]$  is the minimal diversity constraint at time  $t$ . A differential evolutionary  
 224 algorithm was implemented to find the set of  $\mathbf{nc}$  crosses that is a Pareto-optimal solution of Eq. 10  
 225 (Storn and Price 1997; Kinghorn *et al.* 2009; Kinghorn 2011). The direct consideration of  $He(t)$  in the  
 226 optimization allows to control the decrease in genetic diversity similarly to what was suggested for  
 227 controlling inbreeding rate in animal breeding (Woolliams *et al.* 1998, 2015). The loss of diversity along  
 228 time is controlled by the targeted diversity trajectory, i.e.  $He(t), \forall t \in [0, t^*]$  where  $t^* \in \mathbb{N}^*$  is the time  
 229 horizon when the genetic diversity  $He(t^*) = He^*$  should be reached. In this study  $He(t)$  is defined as:

230 
$$He(t) = \begin{cases} He^0 + \left(\frac{t}{t^*}\right)^s (He^* - He^0), & \forall t \in \llbracket 0, t^* \rrbracket \\ He^*, & \forall t > t^* \end{cases}, \text{ [Eq. 11]}$$

## UCPC for optimal cross selection

231 where  $He^0$  is the initial diversity at  $t = 0$  and  $s$  a shape parameter with  $s = 1$  for a linear trajectory.  
232 Fig. 2 gives an illustration of alternative trajectories that can be defined using Eq. 11.

### 233 *Cross selection indices*

234 We considered different cross selection approaches varying in the within family selection  
235 intensity ( $i$ ) in  $V^{(i)}(\mathbf{nc})$ ,  $D^{(i)}(\mathbf{nc})$  (Eq. 10) and of the targeted diversity trajectory  $He(t)$  (Eq. 11). We  
236 first considered as a benchmark the absence of constraint  $D^{(i)}(\mathbf{nc})$ , i.e. the absence of a diversity  
237 trajectory to follow ( $He(t) = 0, \forall t$ ). We defined the cross selection indices PM and UC, respectively  
238 considering  $V^{(i=0)}(\mathbf{nc})$  and  $V^{(i=2.06)}(\mathbf{nc})$  with  $i = 2.06$  corresponding to select the 5% most  
239 performant progeny per family. PM is equivalent to cross the best candidates together without  
240 accounting for within cross variance while UC is defined as crossing candidates based on the expected  
241 mean performance of the 5% selected fraction of progeny. Notice that the absence of constraint on  
242 diversity also means the absence of constraint on parental contributions. To compare optimal cross  
243 selection accounting or not for within family selection, we considered three linear diversity trajectories  
244 (Eq. 11) with  $He^* = \{0.01, 0.10, 0.15\}$  that should be reached in  $t^* = 60$  years. We defined the OCS  
245 methods, further referred to as OCS- $He^*$ , with  $V^{(i=0)}(\mathbf{nc})$  and  $D^{(i=0)}(\mathbf{nc})$ . We defined the UCPC cross  
246 selection methods, further referred as UCPC- $He^*$ , with  $V^{(i=2.06)}(\mathbf{nc})$  and  $D^{(i=2.06)}(\mathbf{nc})$ . The eight cross  
247 selection indices considered are summarized in Table 1.

### 248 **Simulation 1: Interest of UCPC to predict the diversity in the selected fraction of progeny**

249 Simulation 1 aimed at evaluating the interest to account for the effect of selection on parental  
250 contributions, i.e. post-selection parental contributions (using UCPC), compared to ignore selection, i.e.  
251 ante-selection parental contributions (similarly as in OCS), to predict the genetic diversity (He) in the  
252 selected fraction of progeny of a set of 20 crosses (using Eq. 9 and Eq. 3, respectively). We considered  
253 a within family selection intensity corresponding to selecting the 5% most performant progeny. We used  
254 the same genotypes, genetic map and known QTL effects as for the first simulation replicate of the PM  
255 cross selection index in the TRUE scenario (Table 1). We extracted the simulated genotypes of 240 DH  
256 candidate parents of the first post burn-in cohort (further referred as E1) and of 240 DH candidate parents  
257 of the 20th post burn-in cohort (further referred as E2). Due to the selection process, E1 showed a higher

## UCPC for optimal cross selection

258 diversity and lower performance compared to E2. We randomly generated 300 sets of 20 two-way  
259 crosses: 100 sets of intra-generation E1 crosses (E1 x E1), 100 sets of intra-generation E2 crosses (E2 x  
260 E2) and 100 sets of inter- and intra-generation crosses randomly sampled (E1 x E2, E1 x E1, E2 x E2).  
261 We derived 80 DH progeny per cross and predicted the ante- and post-selection parental contributions  
262 to evaluate the post-selection genetic diversity ( $H_e$ ) for each set of crosses. We estimated the empirical  
263 post-selection diversity for each set of crosses and compared predicted and empirical values considering  
264 the mean prediction error as the mean of the difference between predicted  $H_e$  and empirical post-  
265 selection  $H_e$ , and the prediction accuracy as the squared correlation between predicted  $H_e$  and empirical  
266 post-selection  $H_e$ .

### 267 **Simulation 2: Comparison of different cross selection indices**

268 We ran ten independent simulation replicates of all eight CSI summarized in Table 1 for 60  
269 years post burn-in considering known effects at the 1,000 QTLs (TRUE scenario). We also compared  
270 in ten independent simulation replicates the CSI: PM, UC, OCS- $H_e^*$  and UCPC- $H_e^*$  with  $H_e^*=0.01$   
271 considering estimated marker effect at the 2,000 SNPs (GS scenario) and PM based only on phenotypic  
272 evaluation (PS scenario). We followed several variables on the 80 DH progeny/family x 20 crosses  
273 realized every year. At each cohort  $T \in [0,60]$  with  $T = 0$  corresponding to the last burn-in cohort, we  
274 computed the additive genetic variance as the variance of the 1600 DH progeny true breeding values  
275 (TBV):  $\sigma_A^2(T) = var(TBV(T))$ . We followed the mean genetic merit of all progeny  $\mu(T) =$   
276  $mean(TBV(T))$  and of the ten most performant progeny  $\mu_{10}(T) = mean\left(\max_{10}(TBV(T))\right)$  as a proxy  
277 of realized performance that could be achieved at a commercial level by releasing these lines as varieties.  
278 Then, we centered and scaled the two genetic merits to obtain realized cumulative genetic gains in units  
279 of genetic standard deviation at the end of the burn-in ( $T = 0$ ), at the whole progeny level  $G(T) =$   
280  $(\mu(T) - \mu(0))/\sqrt{\sigma_A^2(0)}$  and at the commercial level  $G_{10}(T) = (\mu_{10}(T) - \mu(0))/\sqrt{\sigma_A^2(0)}$ .

281 The interest of long term genetic gain relies on the ability to breed at long term, which depends  
282 on the short term economic success of breeding. Following this rationale, we penalized strategies that  
283 compromised the short term commercial genetic gain using the weighted cumulative discounted  
284 commercial gain following Dekkers et al. (1995) and Chakraborty et al (2002). In practice, we computed

## UCPC for optimal cross selection

285 the weighted sum of the commercial gain value in each generation  $\sum_{T=1}^{60} w_T G_{10}(T)$ , where the weights  
286  $w_T = 1/(1 + \rho)^T, \forall T \in [1,60]$  were scaled to have  $\sum_{T=1}^{60} w_T = 1$  and  $\rho$  is the interest rate per cohort.  
287 For  $\rho = 0$ , the weights were  $w_{T \in [1,60]} = 1/60$ , i.e. the same importance was given to all cohorts. We  
288 compared different values of  $\rho$  and reported results for  $\rho = 0, \rho = 0.04$  giving approximately seven  
289 times more weight to short term gain (after 10 years) compared to long term gain (after 60 years) and  
290  $\rho = 0.2$  giving nearly no weight to gain reached after 30 years of breeding.

291 We also measured the genetic diversity as the additive genic variance at QTLs  $\sigma_a^2(T) =$   
292  $\sum_{j=1}^m 4 p_j(T) (1 - p_j(T)) \beta_j^2$ , the mean expected heterozygosity at QTLs (He, Nei 1973)  $He(T) =$   
293  $m^{-1} \sum_{j=1}^m 2 p_j(T) (1 - p_j(T))$ , and the number of QTLs where the favorable allele was fixed or lost  
294 in the progeny, with  $p_j(T)$  the allele frequency at QTL  $j \in [1, m]$  in the 1600 DH progeny and  $\beta_j$  the  
295 additive effect of the QTL  $j$ . In addition we considered the ratio of additive genetic over genic variance  
296  $\sigma_A^2/\sigma_a^2$  which provides an estimate of the amount of additive genic variance captured by negative  
297 covariances between QTL, known as the Bulmer effect under directional selection (Bulmer 1971, 1980;  
298 Lynch and Walsh 1999). All these variables were further averaged on the ten simulation replicates.

299

## RESULTS

### 300 **Simulation 1**

301 Compared to the usual approach that ignores the effect of selection on parental contributions,  
302 accounting for the effect of within family selection increased the squared correlation ( $R^2$ ) between  
303 predicted genetic diversity and genetic diversity in the selected fraction of progeny (Fig. 3A-B) for all  
304 three types of sets of crosses. The squared correlation between predicted genetic diversity and post-  
305 selection genetic diversity for intra-generation sets of crosses was only slightly increased (E1 x E1: from  
306 0.811 to 0.822 and E2 x E2: from 0.880 to 0.888) while the squared correlation for a set of crosses  
307 involving also inter-generation crosses was more importantly increased (from 0.937 to 0.987) (Fig. 3A-  
308 B). Using post-selection parental contributions instead of ante-selection parental contributions also  
309 reduced the mean prediction error (predicted – empirical  $H_e$ ) (Fig. 4A-B) for all three types of sets of  
310 crosses. The mean prediction error for intra-generation sets of crosses was only slightly reduced (E1 x  
311 E1: from 0.006 to 0.005 and E2 x E2: from 0.016 to 0.015) while the mean prediction error for sets  
312 involving inter-generation crosses was more reduced (from 0.032 to 0.008) (Fig. 4A-B). The mean  
313 prediction error was reduced but still positive when considering post-selection parental contributions,  
314 which means that the genetic diversity in the selected fraction of progeny is overestimated. Note that the  
315 ante-selection contributions predicted well the empirical genetic diversity before selection for three  
316 types of sets of crosses (mean prediction error = 0.000 and  $R^2 > 0.992$ , results not shown).

### 317 **Simulation 2**

#### 318 *Interest of UC over PM*

319 Considering known QTL effects (TRUE scenario), we observed that UC yielded higher short  
320 and long term genetic gain at commercial level ( $G_{10}$ ) than PM (9.316 compared to 8.338 ten years post  
321 burn-in and 18.293 compared to 15.744 sixty years post burn-in, Fig. 5B-C). When considering the  
322 whole progeny mean performance ( $G$ ), PM outperformed UC for the five first years and after five years  
323 UC outperformed PM (Fig. 5A). UC showed higher genic ( $\sigma_a^2$ ) and genetic ( $\sigma_A^2$ ) additive variances than  
324 PM (Fig. 6A-B) but both yielded a genic and genetic variance near to zero after sixty years of breeding.  
325 The genetic over genic variance ratio ( $\sigma_A^2/\sigma_a^2$ ) was also higher for UC compared to PM (Fig. 6C). The

## UCPC for optimal cross selection

326 evolution of genetic diversity ( $H_e$ ) along years followed the same tendency as the genic variance (Fig.  
327 7A, Fig. 6A). UC fixed more favorable alleles at QTLs after 60 years (Fig. 7B) and lost less favorable  
328 alleles at QTLs than PM in all ten simulation replicates with an average of 243.1 QTLs where the  
329 favorable allele was lost compared to 274.9 QTLs for PM (Fig. 7C).

### 330 *Targeted diversity trajectory*

331 Considering known QTL effects (TRUE scenario), the tested optimal cross selection methods  
332 OCS- $H_e^*$  and UCPC- $H_e^*$  showed lower short term genetic gain at the whole progeny level ( $G$ , Fig. 5A)  
333 and at the commercial level ( $G_{10}$ , Fig. 5B-C) but higher long term genetic gain than UC. The lower the  
334 targeted diversity  $H_e^*$ , the higher the short and midterm genetic gain at both whole progeny ( $G$ , Fig.  
335 5A) and commercial ( $G_{10}$ , Fig. 5B-C) levels. The higher the targeted diversity  $H_e^*$ , the higher the long  
336 term genetic gain except for OCS- $H_e^*=0.10$  and OCS- $H_e^*=0.01$  that performed similarly after 60 years  
337 (on average,  $G_{10} = 21.925$  and  $21.892$ , Fig. 5B). The highest targeted diversity ( $H_e^* = 0.15$ ) showed a  
338 strong penalty at short and midterm, while the intermediate targeted diversity ( $H_e^* = 0.10$ ) showed a  
339 lower penalty at short and midterm compared to the lowest targeted diversity ( $H_e^* = 0.01$ ) (Fig. 5A-C).  
340 For all targeted diversities and all simulation replicates, accounting for within family selection (UCPC-  
341  $H_e^*$ ) yielded a higher short term commercial genetic gain ( $G_{10}$ ) after 10 years compared to OCS- $H_e^*$   
342 (Fig. 5B-C). Long term commercial genetic gain ( $G_{10}$ ) after 60 years was also higher for UCPC- $H_e^*$   
343 than for OCS- $H_e^*$  with  $H_e^* = 0.01$  in the ten simulation replicates (on average  $G_{10}$ : 22.869 compared  
344 to 21.892) and with  $H_e^* = 0.10$  in nine out of ten replicates (on average  $G_{10}$ : 22.474 compared to 21.925).  
345 However, for  $H_e^* = 0.15$ , UCPC- $H_e^*$  outperformed OCS- $H_e^*$  at long term in only three out of ten  
346 replicates (on average  $G_{10}$ : 20.665 compared to 20.938) (Fig. 5B-C). The cumulative commercial gain  
347 giving more weight to short term than to long term gain ( $\rho = 0.04$ ) was higher for UCPC- $H_e^*$  than  
348 OCS- $H_e^*$  in all simulation replicates for  $H_e^* = 0.01$  (on average, 12.321 compared to 11.675), in all  
349 simulation replicates for  $H_e^*=0.10$  (on average, 11.788 compared to 11.278) and in nine out of ten  
350 simulation replicates for  $H_e^*=0.15$  (on average, 11.176 compared to 10.884) (Table 2). Cumulative  
351 commercial gain giving the same weight to short and long term gain ( $\rho = 0$ ) was also higher for UCPC-  
352  $H_e^*$  compared to OCS- $H_e^*$  (Table 2). When giving almost no weight to long term gain after 30 years



## UCPC for optimal cross selection

353 ( $\rho = 0.2$ ), the best CSI appeared to be UC followed by the UCPC-He\* with the lowest constraint on  
354 diversity (i.e. low He\*).

355 For a given He\* the additive genic variance ( $\sigma_a^2$ , Fig. 6A) and genetic diversity at QTLs (He,  
356 Fig. 7A) were constrained by the targeted diversity trajectory for both UCPC-He\* or OCS-He\*.  
357 However, UCPC-He\* and OCS-He\* behaved differently for genetic variance ( $\sigma_A^2$ , Fig. 6A) resulting in  
358 differences for the ratio genetic over genic variances ( $\sigma_A^2/\sigma_a^2$ , Fig. 6C). UCPC-He\* yielded a higher  
359 ratio than OCS-He\* (Fig. 6C) independently of the targeted diversity He\* at short and midterm. For low  
360 targeted diversity (He\* = 0.01), UCPC-He\* showed in all ten replicates a lower number of QTLs where  
361 the favorable allele was lost compared to OCS-He\* (Fig. 7C, on average 173.6 QTLs-194.3 QTLs).

### 362 *Estimated marker effects*

363 Considering estimated marker effects (GS scenario) yielded lower genetic gain than when  
364 considering known marker effects (File S1). However, the short and long term superiority of the  
365 usefulness criterion (UC) over the CSI ignoring within cross variance (PM) was consistent with  
366 estimated effects ( $G_{10} = 8.338$  compared to 7.713 ten years post burn-in and  $G_{10} = 15.367$  compared to  
367 13.287 sixty years post burn-in, Fig. 8). Similarly, the short and long term superiority of UCPC-  
368 He\*=0.01 based optimal cross selection over UC and OCS-He\*=0.01 was also conserved ( $G_{10} = 8.162$   
369 compared to 7.734 ten years post burn-in and  $G_{10} = 18.161$  compared to 17.528 sixty years post burn-  
370 in, Fig. 8). Observations on the genic variance ( $\sigma_a^2$ ) and genetic variance ( $\sigma_A^2$ ) were consistent as well.  
371 We also observed that UCPC-He\*=0.01 yielded a lower number of QTLs where the favorable allele was  
372 lost compared to OCS-He\*=0.01 (Fig. 8). PM not considering the marker information, i.e. phenotypic  
373 selection (PS scenario), yielded lower short and long term genetic gains than PM considering marker  
374 information ( $G_{10} = 6.402$  ten years post burn-in and  $G_{10} = 10.810$  sixty years post burn-in, Fig. 8).

## UCPC for optimal cross selection

### 375 DISCUSSION

#### 376 **Predicting the next generation diversity**

377 Accounting for within family selection compared to not accounting for selection to predict the  
378 genetic diversity in the selected fraction of progeny increased the squared correlation and reduced the  
379 mean error of post-selection genetic diversity prediction (Fig. 4, Fig. 3). The gain in squared correlation  
380 (Fig. 3) and the reduction in mean error (Fig. 4), i.e. the interest of UCPC, were more important for  
381 parents showing differences in performance. This result is consistent with observations in Allier et al.  
382 (2019b) where crosses between two phenotypically distant parents yielded post-selection parental  
383 contributions that differ from their expectation before selection (i.e. 0.5). The mean prediction error was  
384 always positive, that can be explained by the use in Eq. 9 of genome-wide parental contributions to  
385 progeny in lieu of parental contributions at individual QTLs to predict allelic frequency changes due to  
386 selection (File S2). As a result, the predicted extreme frequencies at QTLs in the progeny are shrunk  
387 towards the mean frequency, leading to an overestimation of the expected heterozygosity ( $H_e$ ) (results  
388 not shown). Local changes in allele frequency under artificial selection could be predicted following  
389 Falconer and Mackay (1996) and Gallais et al. (2007), but this approach would assume linkage  
390 equilibrium between QTLs, which is a strong assumption that does not correspond to the highly  
391 polygenic trait that we simulated.

#### 392 **Effect of usefulness criterion on short and long term recurrent selection**

393 In a first approach, we considered no constraint on diversity during cross selection and compared  
394 cross selection maximizing the usefulness criterion (UC) or maximizing the parental mean (PM) in the  
395 TRUE scenario assuming known QTL effects and positions. The UC yielded higher short term genetic  
396 gain at commercial level ( $G_{10}$ , Fig. 5B-C). This was expected because UC predicts the mean  
397 performance of the best fraction of progeny. When considering the genetic gain at the mean progeny  
398 level ( $G$ , Fig. 5A), UC needed five years to outperform PM. These results underline that UC maximizes  
399 the mean performance of the next generation issued from the intercross of selected progeny, sometimes  
400 at the expense of the current generation progeny mean performance. This observation is consistent with  
401 the fact that candidate parents of the sixth cohort came all from the three first cohorts generated  
402 considering UC and thus the sixth cohort took the full advantage of the use of UC (Fig. 1A). This

## UCPC for optimal cross selection

403 tendency was also observed in simulations by Müller et al. (2018) considering the EMBV approach,  
404 akin to the UC for normally distributed additive traits. The UC also showed a higher long term genetic  
405 gain at both commercial ( $G_{10}$ ) and whole progeny level (G) compared to intercross the best candidate  
406 parents (PM). This long term gain was driven by a higher additive genic variance at QTLs ( $\sigma_a^2$ , Fig. 6A)  
407 and a lower genomic covariance between QTLs ( $\sigma_A^2/\sigma_a^2$ , Fig. 6C) resulting in a higher additive genetic  
408 variance in UC compared to PM ( $\sigma_A^2$ , Fig. 6B). Note that with lower  $\sigma_a^2$  the ratio  $\sigma_A^2/\sigma_a^2$  becomes less  
409 interpretable at long term (Fig. 6C). UC also better managed the fixation (Fig. 7B) or the maintenance  
410 (Fig. 7C) of the favorable allele at QTLs compared to PM. These results highlight the interest of  
411 considering within cross variance in cross selection for improving long term genetic gain as observed in  
412 Müller et al. (2018).

### 413 Accounting for within family variance in optimal cross selection

414 Assuming known marker effects, we observed that to consider a constraint on diversity, i.e. in  
415 optimal cross selection, always maximized the long term genetic gain along with a variable penalty at  
416 short term gain compared to no constraint on diversity when selecting crosses (e.g. UC). We further  
417 compared the OCS (Gorjanc *et al.* 2018) with the UCPC based optimal cross selection that accounts for  
418 the fact that only a selected fraction of each family is candidate for the next generation. In the  
419 optimization framework considered, we compared the ability of UCPC (referred to as UCPC-He\*) and  
420 OCS (referred to as OCS-He\*) to convert a determined loss of diversity into genetic gain. For a given  
421 diversity trajectory, UCPC-He\* yielded higher short term commercial gain than OCS-He\*. Both, OCS-  
422 He\* and UCPC-He\* yielded similar additive genic variance ( $\sigma_a^2$ ) but we observed differences in terms  
423 of the ratio  $\sigma_A^2/\sigma_a^2$ . As expected under directional selection, the ratio  $\sigma_A^2/\sigma_a^2$  was positive and inferior  
424 to one, revealing a negative genomic covariance between QTLs (Bulmer 1971). UCPC-He\* yielded a  
425 higher ratio, i.e. lower repulsion, and thus a higher additive genetic variance ( $\sigma_A^2$ ) than OCS-He\* for a  
426 similar He\*. This explains the higher long term genetic gain at commercial and whole progeny levels  
427 observed for UCPC-He\*. This result supports the idea, suggested in Allier et al. (2019a), that accounting  
428 for complementarity between parents when defining crossing plans is an efficient way to favor  
429 recombination events to reveal part of the additive genic variance hidden by repulsion between QTLs.

## UCPC for optimal cross selection

430 For low targeted diversity ( $He^* = 0.01$ ), UCPC- $He^*$  also appeared to better manage the rare favorable  
431 alleles at QTLs than OCS- $He^*$ . These results highlighted the interest of UCPC based optimal cross  
432 selection to convert the loss of genetic diversity into genetic gain by maintaining more rare favorable  
433 alleles and limiting repulsion between QTLs. Note that the superiority of UCPC- $He^*$  over OCS- $He^*$  for  
434 long term genetic gain decreased when considering higher targeted diversity. In case of higher targeted  
435 diversity ( $He^* = 0.15$ ), the loss of diversity was likely not sufficient to fully express the additional  
436 interest of UCPC compared to OCS to convert diversity into genetic gain. In this case UCPC- $He^*$  and  
437 OCS- $He^*$  performed similarly. Accounting for within cross variance to measure the expected gain of a  
438 cross in optimal cross selection was already suggested in Shepherd and Kinghorn (1998). More recently,  
439 Akdemir and Sánchez (2016) and Akdemir et al. (2018) accounted for within cross variance considering  
440 linkage equilibrium between QTLs. Akdemir and Sánchez (2016) also observed that accounting for  
441 within cross variance during cross selection yielded higher long term mean performance with a penalty  
442 at short term mean progeny performance.

443 Short term economic returns condition the ability of a breeder to target long term genetic gain.  
444 Hence, it is necessary to make sure that tested breeding strategy do not compromise too much the short  
445 term commercial genetic gain. For this reason, we considered the weighted cumulative discounted  
446 commercial gain following Dekkers et al. (1995) and Chakraborty et al (2002) as a summary variable to  
447 evaluate CSI while giving more or less weight to short and long term performance. UCPC- $He^*$   
448 outperformed OCS- $He^*$  for a given  $He^*$  considering either uniform weights ( $\rho = 0$ ) or giving  
449 approximately seven time more weight to short term gain compared to long term gain ( $\rho = 0.04$ ). This  
450 was also true when focusing only on short term gain ( $\rho = 0.2$ ), but in this case the best model was UC  
451 without accounting for diversity while selecting crosses (Table 2).

### 452 **Practical implementations in breeding**

#### 453 *UCPC with estimated marker effects*

454 In simulations, we firstly considered 1,000 QTLs with known additive effects sampled from a  
455 centered normal distribution. For a representative subset of cross selection indices (PM, UC, UCPC-  
456  $He^*$  and OCS- $He^*$  with  $He^*=0.01$ , Fig. 8) we considered 2,000 SNPs estimated effects. The main  
457 conclusions were consistent considering both estimated and known marker effects, supporting the

## UCPC for optimal cross selection

458 practical interest of UCPC based optimal cross selection (Fig. 8). With estimated marker effects instead  
459 of known QTL effects, the predicted progeny variance ( $\sigma^2$ ) corresponded to the variance of the predicted  
460 breeding values which are shrunk compared to true breeding values depending on the model accuracy  
461 (referred to as variance of posterior mean, VPM in Lehermeier *et al.* (2017a; b)). An alternative would  
462 be to consider the marker effects estimated at each sample of a Monte Carlo Markov Chain process, e.g.  
463 using a Bayesian Ridge Regression, to obtain an improved estimate of the additive genetic variance  
464 (referred to as posterior mean variance, PMV in Lehermeier *et al.* (2017a; b)).

465 In practice, QTL effects are unknown, so the selection of progeny cannot be based on true  
466 breeding values and thus the selection accuracy ( $h$ ) is smaller than one. In our simulation study assuming  
467 unknown QTLs (GS scenario), progeny were selected based on estimated breeding values taking into  
468 account genotypic information as well as replicated phenotypic information leading to a high selection  
469 accuracy, as it can be encountered in breeding. In order to shorten the cycle length of the breeding  
470 scheme, selection of progeny can be based on predicted GEBVs of genotyped but not phenotyped  
471 progeny. In such a case, the selection accuracy ( $h$ ) will be considerably reduced. We assume that  
472 selection based on UCPC can be improved when using PMV instead of VPM and by taking into account  
473 the proper selection accuracy ( $h$ ) within crosses adapted to the selection scheme. When selection is  
474 based on predicted values, i.e. genotyped but not phenotyped progeny, the shrunk predictor VPM might  
475 present a good approximation of  $(h\sigma)^2$ .

### 476 *UCPC based optimal cross selection*

477 In this study, we assumed fully homozygous parents and two-way crosses. However, neither the  
478 optimal cross selection nor UCPC based optimal cross selection are restricted to homozygote parents.  
479 Considering heterozygote parents in optimal cross selection is straightforward. Following the extension  
480 of UCPC to four-way crosses (Allier *et al.* 2019b), UCPC optimal cross selection can be used for phased  
481 heterozygous individuals, as it is commonly the case in perennial plants or animal breeding. We  
482 considered an inbred line breeding program but the extension to hybrid breeding is of interest for species  
483 as maize. The use of testcross effects, i.e. estimated on hybrids obtained by crossing candidate lines with  
484 lines from the opposite heterotic pool, in UCPC based optimal cross selection is straightforward and so  
485 the UCPC based optimal cross selection can be used to improve each heterotic pool individually. In

## UCPC for optimal cross selection

486 order to jointly improve two pools, further investigations are required to include dominance effects in  
487 UCPC based optimal cross selection. In addition, this would imply that crossing plans in both pools are  
488 jointly optimized to manage genetic diversity within pools and complementarity between pools.

489 We considered a within family selection intensity corresponding to the selection of the five  
490 percent most performant progeny as candidates for the next generation. Equal selection intensities were  
491 assumed for all families but in practice due to experimental constraints or optimized resource allocation  
492 (e.g. generate more progeny for crosses showing high progeny variance but low progeny mean), within  
493 family selection intensity can be variable. Different within family selection intensities (see Eq. 8 and  
494 Eq. 9) can be considered in UCPC based optimal cross selection, but an optimization regarding resource  
495 allocation of the number of crosses and the selection intensities within crosses warrants further  
496 investigations. However, in marker-assisted selection schemes based on QTL detection results  
497 (Bernardo *et al.* 2006) an optimization of selection intensities per family was observed to be only of  
498 moderate interest.

499 Proposed UCPC based optimal cross selection was compared to OCS in a targeted diversity  
500 trajectory context. We considered a linear trajectory but any genetic diversity trajectory can be  
501 considered (e.g. Fig. 2). The optimal diversity trajectory cannot be easily determined and depends on  
502 breeding objectives and data considered. Optimal contribution selection in animal breeding considers a  
503 similar  $\epsilon$ -constraint optimization with a targeted inbreeding trajectory determined by a fixed annual rate  
504 of inbreeding (e.g. 1% advocated by the FAO, Woolliams *et al.* 1998). Woolliams (2015) argued that  
505 the optimal inbreeding rate is also not straightforward to define. An alternative formulation of the  
506 optimization problem to avoid the use of a fixed constraint is to consider a weighted index  
507  $(1 - \alpha)V(\mathbf{nc}) + \alpha D(\mathbf{nc})$ , where  $\alpha$  is the weight balancing the expected gain  $V(\mathbf{nc})$  and constraint  
508  $D(\mathbf{nc})$  (De Beukelaer *et al.* 2017). However, the appropriate choice of  $\alpha$  is difficult and is not explicit  
509 either in terms of expected diversity nor expected gain.

### 510 *Introgression of diversity and anticipation of a changing breeding context*

511 We considered candidate parents coming from the three last overlapping cohorts (Fig. 1) in  
512 order to reduce the number of candidate crosses during the progeny covariances prediction (UCPC) and  
513 the optimization process. This yielded elite candidate parents that were not directly related (no parent-

## UCPC for optimal cross selection

514 progeny) and that did not show strong differences in performances, which is standard in a commercial  
515 plant breeding program focusing on yield improvement. However, when the genetic diversity in a  
516 program is too low so that long term genetic gain is compromised, external genetic resources need to be  
517 introgressed by crosses with internal elite parents. As suggested by results of simulation 1, we conjecture  
518 that the advantage of UCPC based optimal cross selection over OCS increases in such a context where  
519 heterogeneous, i.e. phenotypically distant, genetic material are crossed. This requires investigations that  
520 we hope to address in subsequent research.

521 Our simulations also assumed fixed environments and a single targeted trait over sixty years.  
522 However, in a climate change context and with rapidly evolving societal demands for sustainable  
523 agricultural practices, environments and breeders objectives will likely change over time. In a multi-  
524 trait context, the multi-objective optimization framework proposed in Akdemir et al. (2018) can be  
525 adapted to UCPC based optimal cross selection. The upcoming but yet unknown breeding objectives  
526 make the necessity to manage genetic diversity even more important than highlighted in this study.

## UCPC for optimal cross selection

### TABLES & FIGURES

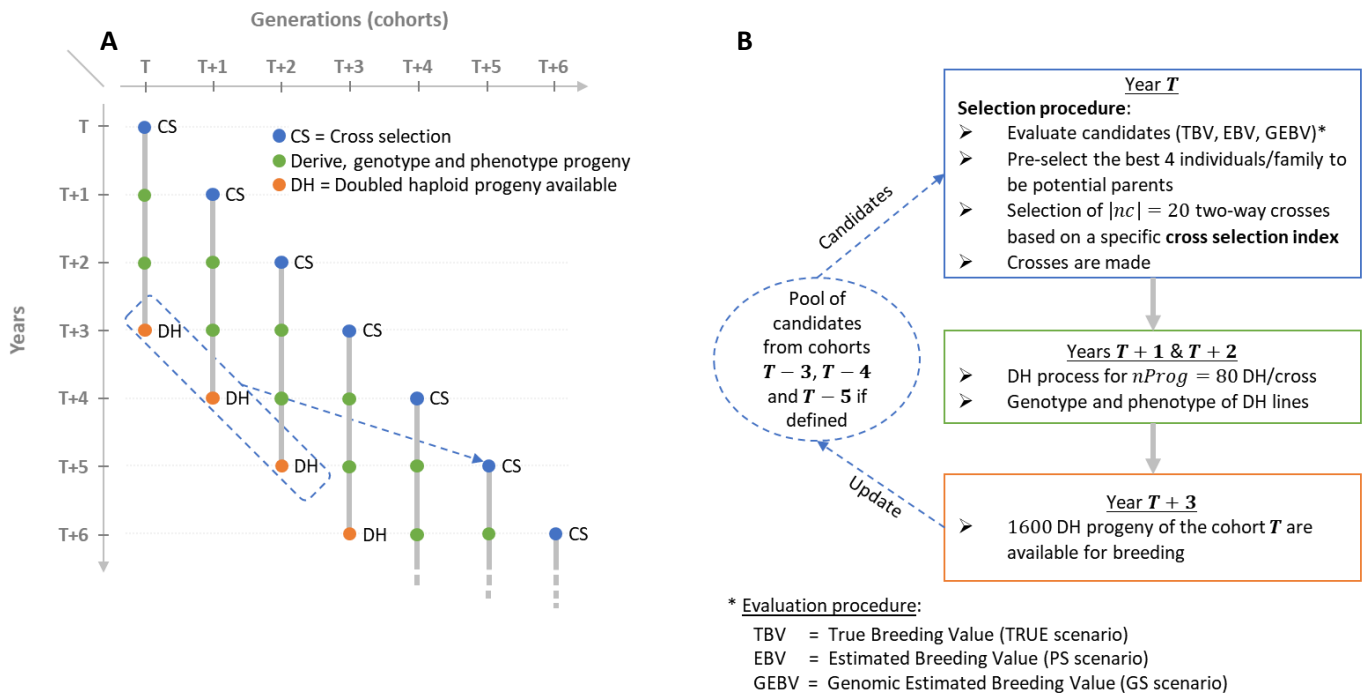

**Figure 1** Schematic view of the simulated breeding program: (A) overall view of the breeding program and overlapping cohorts, (B) life cycle of a given post burn-in cohort  $T$  depending on the scenario considered (TRUE with 1,000 known QTL effects, PS in absence of genomic information or GS with 2,000 non causal SNPs estimated effects).

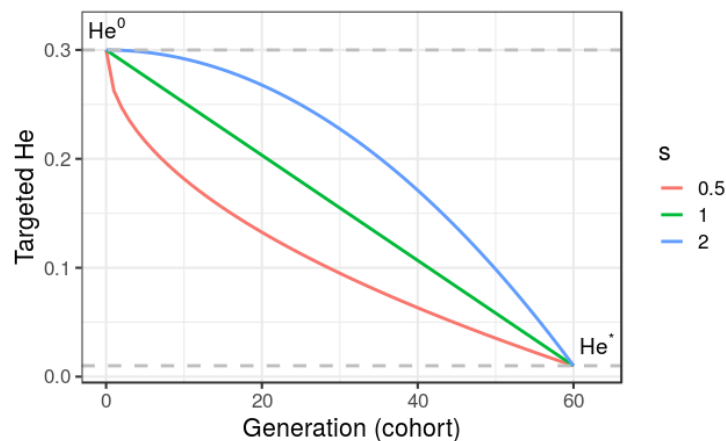

**Figure 2** Targeted diversity trajectories for three different shape parameters ( $s = 1$ , linear trajectory;  $s = 2$ , quadratic trajectory and  $s = 0.5$  inverse quadratic trajectory) for fixed initial diversity ( $He^0 = 0.3$ ) at generation 0 and targeted diversity ( $He^* = 0.01$ ) at generation 60 ( $t^* = 60$ ). We considered in this study only linear trajectories ( $s = 1$ ).



## UCPC for optimal cross selection

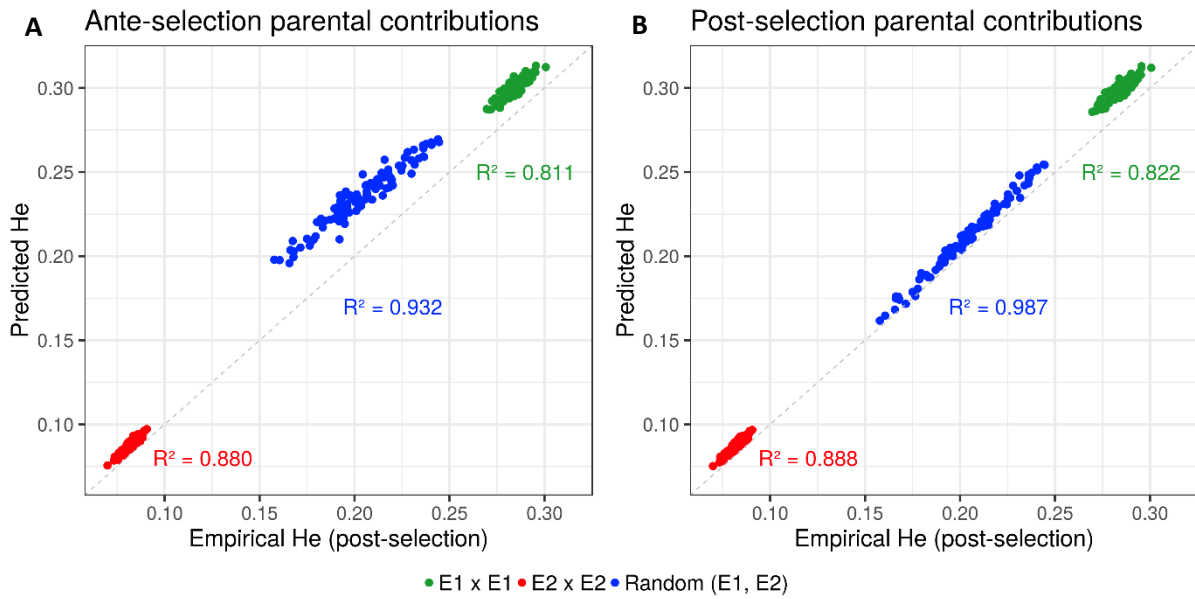

**Figure 3** Squared correlations ( $R^2$ ) between predicted genetic diversity ( $He$ ) and empirical  $He$  in the selected fraction of progeny of a set of 20 biparental crosses in the TRUE scenario considering (A) ante-selection parental contributions or (B) post-selection parental contributions to predict  $He$ . In total 100 sets of each three types of crosses (intra-generation: E1xE1 and E2xE2 or randomly intra and inter-generations: Random (E1,E2)) are shown and the squared correlations between predicted and empirical post-selection  $He$  are given in the corresponding color.

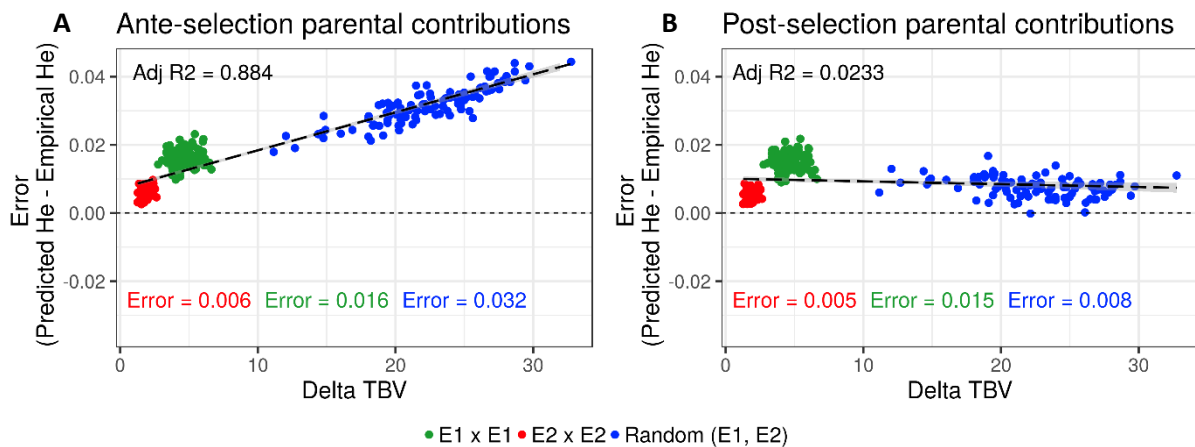

**Figure 4** Mean prediction error (predicted - empirical) of predicting the genetic diversity ( $He$ ) in the selected fraction of progeny of a set of 20 biparental crosses in the TRUE scenario depending on the mean difference of performance between parents (Delta TBV). Mean prediction error is measured as the predicted  $He$  - empirical post-selection  $He$ , considering (A) ante-selection parental contributions or (B) post-selection parental contributions to predict  $He$ . In total 100 sets of each three types of crosses (intra-generation: E1xE1 and E2xE2 or randomly intra and inter-generations: Random (E1,E2)) are shown and the averaged errors are given in the corresponding color.

## UCPC for optimal cross selection

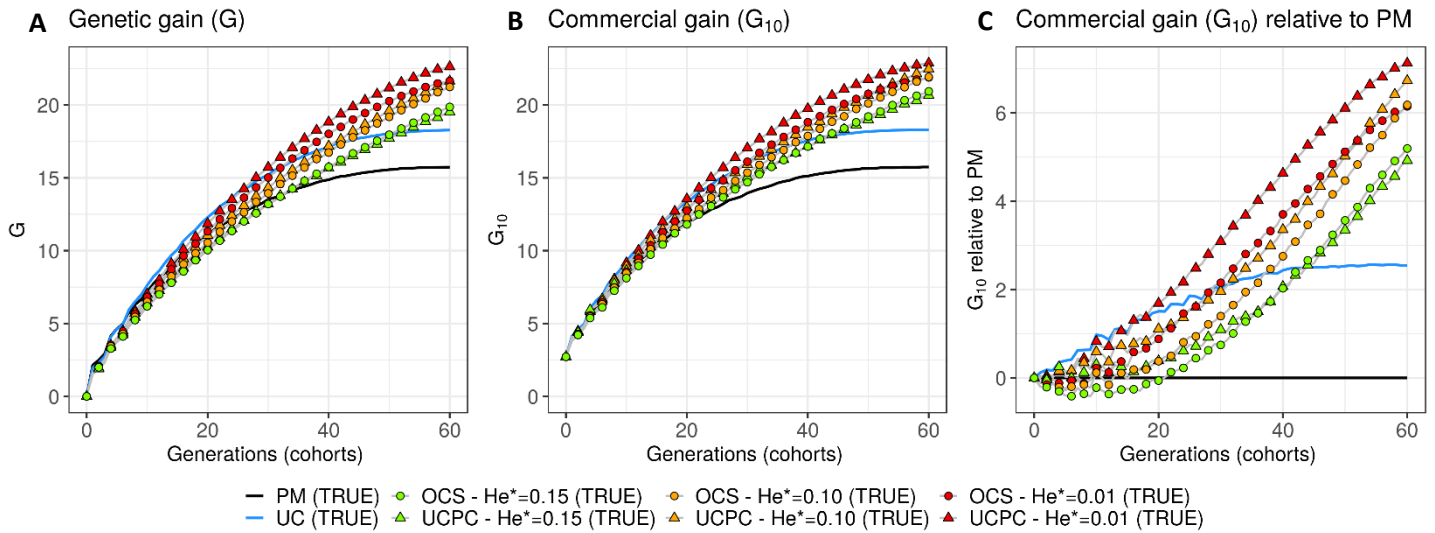

**Figure 5** Genetic gains for different cross selection indices in the TRUE scenario (PM: parental mean, UC: usefulness criterion, OCS-He\*: optimal cross selection and UCPC-He\*: UCPC based optimal cross selection) according to the generations. (A) Genetic gain (G) measured as the mean of the whole progeny, (B) commercial genetic gain ( $G_{10}$ ) measured as the mean of the ten best progeny and (C)  $G_{10}$  relative to selection based on parental mean (PM).

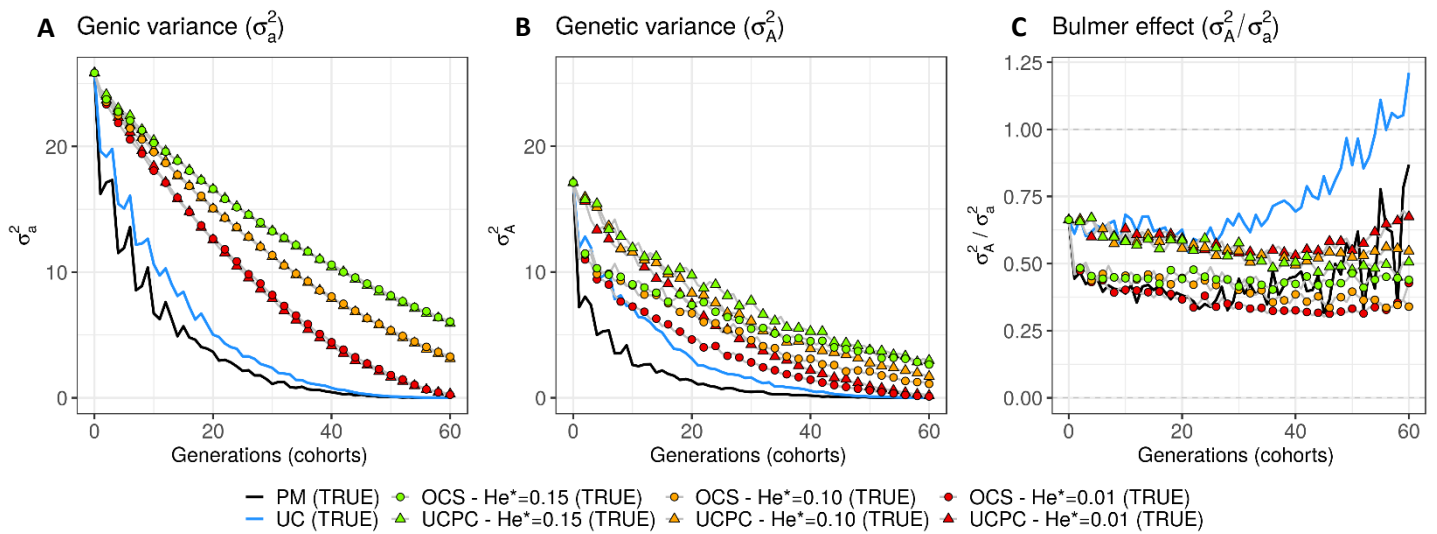

**Figure 6** Genetic and genic additive variances for different cross selection indices in the TRUE scenario (PM: parental mean, UC: usefulness criterion, OCS-He\*: optimal cross selection and UCPC-He\*: UCPC based optimal cross selection) according to the generations. (A) Additive genic variance ( $\sigma_a^2$ ) measured on the whole progeny, (B) additive genetic variance ( $\sigma_A^2$ ) measured on the whole progeny and (C) ratio of genetic over genic variance ( $\sigma_A^2/\sigma_a^2$ ) reflecting the Bulmer effect.

## UCPC for optimal cross selection

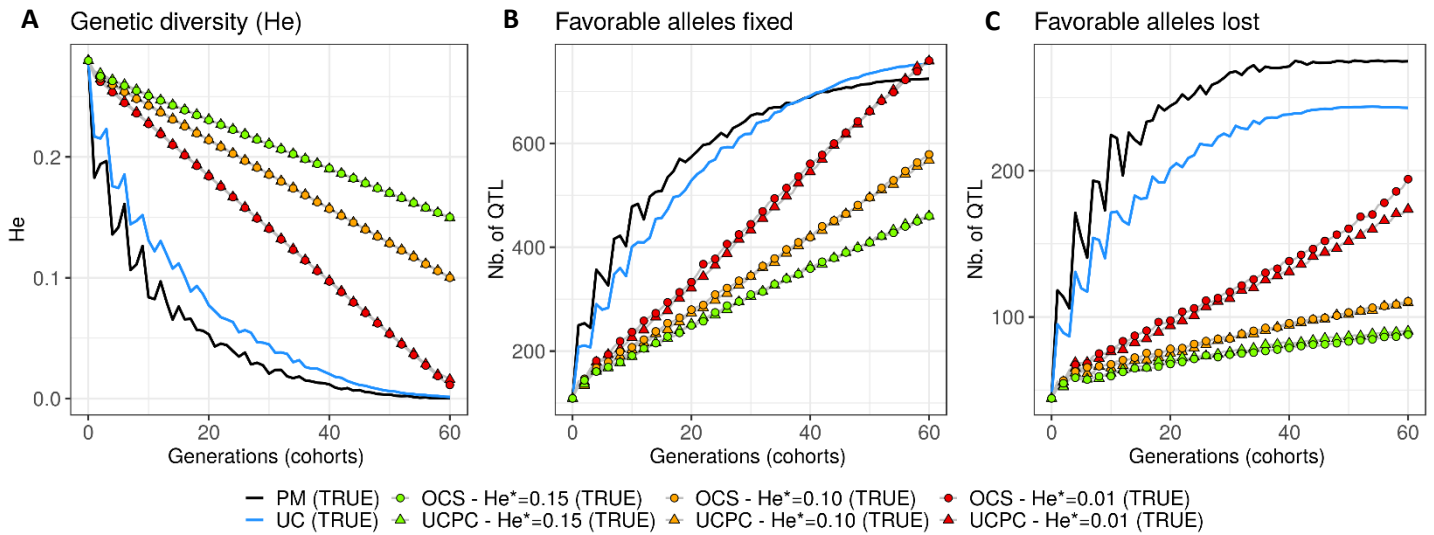

**Figure 7** Genetic diversity at QTLs for different cross selection indices in the TRUE scenario (PM: parental mean, UC: usefulness criterion, OCS- $H_e^*$ : optimal cross selection and UCPC- $H_e^*$ : UCPC based optimal cross selection) according to the generations. (A) Genetic diversity at QTLs in the whole progeny ( $H_e$ ), (B) number of QTLs where the favorable allele is fixed in the whole progeny and (C) number of QTLs where the favorable allele is lost in the whole progeny.

## UCPC for optimal cross selection

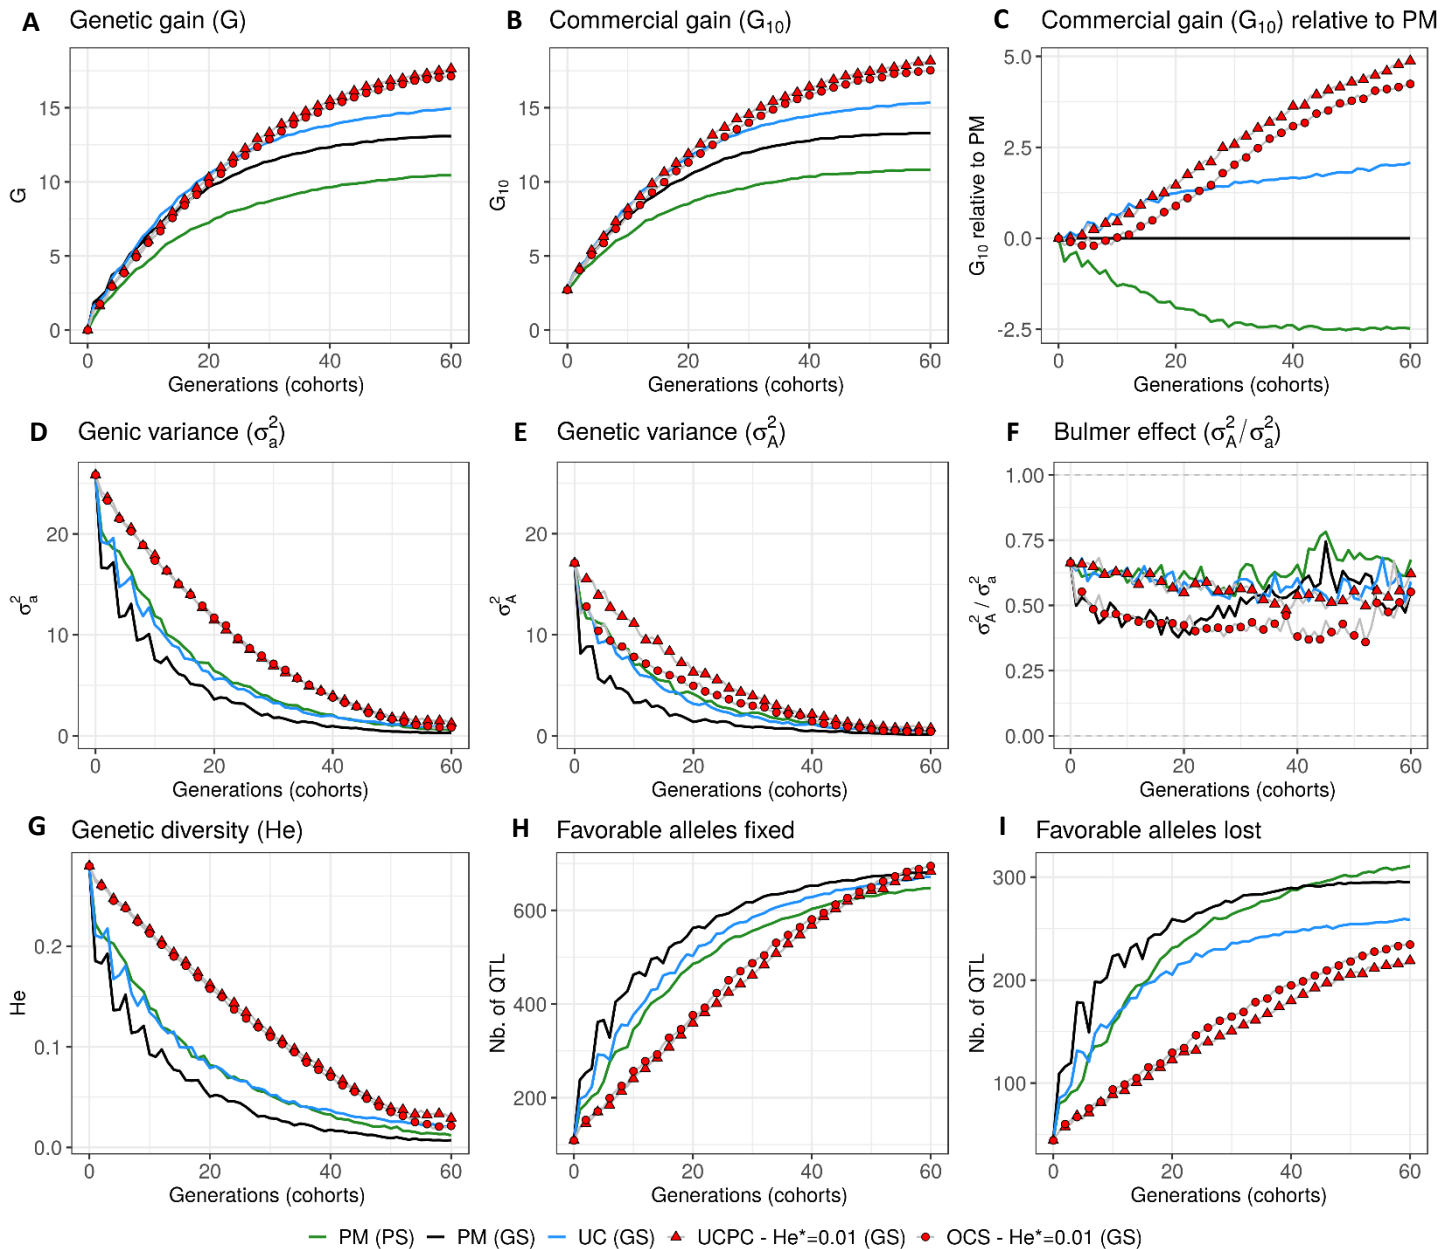

**Figure 8** Evolution of different variables for different cross selection indices according to the generations in the GS scenario (PM: parental mean, UC: usefulness criterion, OCS-He\*: optimal cross selection and UCPC-He\*: UCPC based optimal cross selection for  $He^*=0.01$ ) and in the PS scenario (PM: parental mean). (A) Genetic gain at whole progeny level (G), (B) genetic gain at commercial level ( $G_{10}$ ) and (C)  $G_{10}$  relatively to PM (GS), genetic gain is measured on true breeding values. (D) Genic variance at QTLs ( $\sigma_a^2$ ), (E) genetic variance of true breeding values ( $\sigma_A^2$ ) and (F) ratio of genic over genetic variance ( $\sigma_A^2 / \sigma_a^2$ ), (G) genetic diversity at QTLs and number of QTLs where the favorable allele was fixed (H) and lost (I).

## UCPC for optimal cross selection

**Table 1** Summary of tested cross selection indices (CSI) defined for a set of crosses  $\mathbf{nc}$  depending on the within family selection intensity  $i$ .

| Cross selection index (CSI) | Gain term                   | Diversity term              |
|-----------------------------|-----------------------------|-----------------------------|
| PM                          | $V^{(i=0)}(\mathbf{nc})$    | -                           |
| OCS-He* (3 different He*)   | $V^{(i=0)}(\mathbf{nc})$    | $D^{(i=0)}(\mathbf{nc})$    |
| UC                          | $V^{(i=2.06)}(\mathbf{nc})$ | -                           |
| UCPC-He* (3 different He*)  | $V^{(i=2.06)}(\mathbf{nc})$ | $D^{(i=2.06)}(\mathbf{nc})$ |

$He^* = \{0.15; 0.10; 0.01\}$  to be reached linearly ( $s = 1$ ) at the end of simulation ( $t^* = 60$  years).  $V^{(i=0)}(\mathbf{nc})$  is the averaged parental mean (PM) of crosses in  $\mathbf{nc}$  and  $V^{(i=2.06)}(\mathbf{nc})$  is the averaged usefulness criterion (UC) of crosses in  $\mathbf{nc}$  considering a within family selection intensity of 2.06.  $D^{(i=0)}(\mathbf{nc})$  and  $D^{(i=2.06)}(\mathbf{nc})$  are the expected genetic diversity in the progeny before and after within family selection, respectively.

**Table 2** Weighted cumulative gain for three different parameters  $\rho$  giving more or less weight to short term gain than to long term gain and assuming known QTL effects (TRUE scenario)

| Cross selection index (CSI) | Weighted cumulative gain |                           |                          |
|-----------------------------|--------------------------|---------------------------|--------------------------|
|                             | $\rho = 0$<br>(# rank)   | $\rho = 0.04$<br>(# rank) | $\rho = 0.2$<br>(# rank) |
| UCPC - He*=0.01 (TRUE)      | 15.949 (#1)              | 12.321 (#1)               | 6.682 (#2)               |
| UCPC - He*=0.10 (TRUE)      | 15.174 (#2)              | 11.788 (#2)               | 6.593 (#3)               |
| UC (TRUE)                   | 14.408 (#5)              | 11.689 (#3)               | 6.822 (#1)               |
| OCS - He*=0.01 (TRUE)       | 15.148 (#3)              | 11.675 (#4)               | 6.360 (#5)               |
| OCS - He*=0.10 (TRUE)       | 14.630 (#4)              | 11.278 (#5)               | 6.230 (#7)               |
| UCPC - He*=0.15 (TRUE)      | 14.205 (#6)              | 11.176 (#6)               | 6.454 (#4)               |
| OCS - He*=0.15 (TRUE)       | 14.056 (#7)              | 10.884 (#7)               | 6.103 (#8)               |
| PM (TRUE)                   | 12.609 (#8)              | 10.392 (#8)               | 6.345 (#6)               |

Mean weighted cumulative gain with  $\rho = 0$  (constant weight along years),  $\rho = 0.04$  (decreasing weight along years) and  $\rho = 0.2$  (nearly null weights after 30 years) on the ten independent replicates. For each weighted cumulative gain, the rank of the CSI (# rank) from the most performant (#1) to the less performant (#8) is given.

## **UCPC for optimal cross selection**

### **Author contributions**

ST, CL, AC and LM supervised the study. AA performed the simulations and wrote the manuscript. ST worked on the implementation in the simulator. All authors reviewed and approved the manuscript.

### **Conflict of Interest**

The authors declare that the research was conducted in the absence of any commercial or financial relationships that could be construed as a potential conflict of interest.

### **Acknowledgments**

This research was funded by RAGT2n and the ANRT CIFRE Grant n° 2016/1281 for AA.

### **Supplementary material**

File S1 details the simulated breeding program; File S2 demonstrates the relationship between IBS coancestry and genetic diversity ( $H_e$ ) in progeny and File S3 provides the R code to evaluate a set of crosses as presented in the UCPC based optimal cross selection.

**CITED LITERATURE**

- Akdemir D., and J. I. Sánchez, 2016 Efficient Breeding by Genomic Mating. *Front. Genet.* 7.
- Akdemir D., W. Beavis, R. Fritsche-Neto, A. K. Singh, and J. Isidro-Sánchez, 2018 Multi-objective optimized genomic breeding strategies for sustainable food improvement. *Heredity* 1.
- Allier A., S. Teyssèdre, C. Lehermeier, B. Claustres, S. Maltese, *et al.*, 2019a Assessment of breeding programs sustainability: application of phenotypic and genomic indicators to a North European grain maize program. *Theor. Appl. Genet.*
- Allier A., L. Moreau, A. Charcosset, S. Teyssèdre, and C. Lehermeier, 2019b Usefulness Criterion and Post-selection Parental Contributions in Multi-parental Crosses: Application to Polygenic Trait Introgression. *G3 Genes Genomes Genet.* 9: 1469–1479.
- Bernardo R., L. Moreau, and A. Charcosset, 2006 Number and Fitness of Selected Individuals in Marker-Assisted and Phenotypic Recurrent Selection. *Crop Sci.* 46: 1972–1980.
- Bulmer M., 1971 The stability of equilibria under selection. *Heredity* 27: 157–162.
- Bulmer M., 1980 *The Mathematical Theory of Quantitative Genetics*. New York.
- Chakraborty R., L. Moreau, and J. C. Dekkers, 2002 A method to optimize selection on multiple identified quantitative trait loci. *Genet. Sel. Evol.* 34: 145.
- Clark S. A., J. M. Hickey, and J. H. van der Werf, 2011 Different models of genetic variation and their effect on genomic evaluation. *Genet. Sel. Evol. GSE* 43: 18.
- Daetwyler H. D., M. P. L. Calus, R. Pong-Wong, G. de los Campos, and J. M. Hickey, 2013 Genomic Prediction in Animals and Plants: Simulation of Data, Validation, Reporting, and Benchmarking. *Genetics* 193: 347–365.

## UCPC for optimal cross selection

Daetwyler H. D., M. J. Hayden, G. C. Spangenberg, and B. J. Hayes, 2015 Selection on Optimal Haploid Value Increases Genetic Gain and Preserves More Genetic Diversity Relative to Genomic Selection. *Genetics* 200: 1341–1348.

De Beukelaer H. D., Y. Badke, V. Fack, and G. D. Meyer, 2017 Moving Beyond Managing Realized Genomic Relationship in Long-Term Genomic Selection. *Genetics* genetics.116.194449.

Dekkers J. C. M., P. V. Birke, and J. P. Gibson, 1995 Optimum linear selection indexes for multiple generation objectives with non-linear profit functions. *Anim. Sci.* 61: 165–175.

Falconer D. S., and T. F. C. Mackay, 1996 *Introduction to Quantitative Genetics. 4th ed.* Pearson, Harlow, England.

Fradgley N., K. A. Gardner, J. Cockram, J. Elderfield, J. M. Hickey, *et al.*, 2019 A large-scale pedigree resource of wheat reveals evidence for adaptation and selection by breeders. *PLOS Biol.* 17: e3000071.

Gallais A., L. Moreau, and A. Charcosset, 2007 Detection of marker–QTL associations by studying change in marker frequencies with selection. *Theor. Appl. Genet.* 114: 669–681.

Ganal M. W., G. Durstewitz, A. Polley, A. Bérard, E. S. Buckler, *et al.*, 2011 A Large Maize (*Zea mays* L.) SNP Genotyping Array: Development and Germplasm Genotyping, and Genetic Mapping to Compare with the B73 Reference Genome. *PLOS ONE* 6: e28334.

Gerke J. P., J. W. Edwards, K. E. Guill, J. Ross-Ibarra, and M. D. McMullen, 2015 The Genomic Impacts of Drift and Selection for Hybrid Performance in Maize. *Genetics* 201: 1201–1211.

Giraud H., C. Lehermeier, E. Bauer, M. Falque, V. Segura, *et al.*, 2014 Linkage Disequilibrium with Linkage Analysis of Multiline Crosses Reveals Different Multiallelic QTL for Hybrid Performance in the Flint and Dent Heterotic Groups of Maize. *Genetics* 198: 1717–1734.



## UCPC for optimal cross selection

- Gorjanc G., R. C. Gaynor, and J. M. Hickey, 2018 Optimal cross selection for long-term genetic gain in two-part programs with rapid recurrent genomic selection. *Theor. Appl. Genet.* 131: 1953–1966.
- Gorjanc G., and J. M. Hickey, 2018 AlphaMate: a program for optimizing selection, maintenance of diversity and mate allocation in breeding programs. *Bioinformatics* 34: 3408–3411.
- Haimes Y., L. S. Lasdon, and D. Wimer, 1971 On a bicriterion formation of the problems of integrated system identification and system optimization. *IEEE Trans. Syst. Man Cybern.* SMC-1: 296–297.
- Hayes B. J., J. Pryce, A. J. Chamberlain, P. J. Bowman, and M. E. Goddard, 2010 Genetic Architecture of Complex Traits and Accuracy of Genomic Prediction: Coat Colour, Milk-Fat Percentage, and Type in Holstein Cattle as Contrasting Model Traits. *PLOS Genet.* 6: e1001139.
- Henderson C. R., 1984 *Applications of linear models in animal breeding*. Guelph: University of Guelph.
- Heslot N., J.-L. Jannink, and M. E. Sorrells, 2015 Perspectives for Genomic Selection Applications and Research in Plants. *Crop Sci.* 55: 1–12.
- Jannink J.-L., 2010 Dynamics of long-term genomic selection. *Genet. Sel. Evol.* 42: 35.
- Kinghorn B. P., R. Banks, C. Gondro, V. D. Kremer, S. A. Meszaros, *et al.*, 2009 Strategies to Exploit Genetic Variation While Maintaining Diversity, pp. 191–200 in *Adaptation and Fitness in Animal Populations*, Springer, Dordrecht.
- Kinghorn B. P., 2011 An algorithm for efficient constrained mate selection. *Genet. Sel. Evol.* 43: 4.
- Lehermeier C., G. de los Campos, V. Wimmer, and C.-C. Schön, 2017a Genomic variance estimates: With or without disequilibrium covariances? *J. Anim. Breed. Genet.* 134: 232–241.

## UCPC for optimal cross selection

- Lehermeier C., S. Teyssèdre, and C.-C. Schön, 2017b Genetic Gain Increases by Applying the Usefulness Criterion with Improved Variance Prediction in Selection of Crosses. *Genetics* 207: 1651–1661.
- Lin Z., N. O. I. Cogan, L. W. Pembleton, G. C. Spangenberg, J. W. Forster, *et al.*, 2016 Genetic Gain and Inbreeding from Genomic Selection in a Simulated Commercial Breeding Program for Perennial Ryegrass. *Plant Genome* 9.
- Lin Z., F. Shi, B. J. Hayes, and H. D. Daetwyler, 2017 Mitigation of inbreeding while preserving genetic gain in genomic breeding programs for outbred plants. *Theor. Appl. Genet.* 130: 969–980.
- Lynch M., and B. Walsh, 1999 *Evolution and Selection of Quantitative Traits*. Sunderland, MA.
- Meuwissen T. H., 1997 Maximizing the response of selection with a predefined rate of inbreeding. *J. Anim. Sci.* 75: 934–940.
- Meuwissen T. H., B. J. Hayes, and M. E. Goddard, 2001 Prediction of total genetic value using genome-wide dense marker maps. *Genetics* 157: 1819–1829.
- Mohammadi M., T. Tiede, and K. Smith, 2015 PopVar: A Genome-Wide Procedure for Predicting Genetic Variance and Correlated Response in Biparental Breeding Populations. *Crop Sci.* 55: 2068–2077.
- Müller D., P. Schopp, and A. E. Melchinger, 2018 Selection on Expected Maximum Haploid Breeding Values Can Increase Genetic Gain in Recurrent Genomic Selection. *G3 Genes Genomes Genet.* g3.200091.2018.
- Nei M., 1973 Analysis of gene diversity in subdivided populations. *Proc. Natl. Acad. Sci. U. S. A.* 70: 3321–3323.

## UCPC for optimal cross selection

Piepho H. P., J. Möhring, A. E. Melchinger, and A. Büchse, 2008 BLUP for phenotypic selection in plant breeding and variety testing. *Euphytica* 161: 209–228.

Pryce J. E., B. J. Hayes, and M. E. Goddard, 2012 Novel strategies to minimize progeny inbreeding while maximizing genetic gain using genomic information. *J. Dairy Sci.* 95: 377–388.

Pszczola M., T. Strabel, H. A. Mulder, and M. P. L. Calus, 2012 Reliability of direct genomic values for animals with different relationships within and to the reference population. *J. Dairy Sci.* 95: 389–400.

R Core Team, 2017 *R: A language and environment for statistical computing*. R Foundation for Statistical Computing, Vienna, Austria.

Rauf S., J. A. Teixeira da Silva, A. A. Khan, and A. Naveed, 2010 Consequences of plant breeding on genetic diversity. *Int. J. Plant Breed.* 4: 1–21.

Rio S., T. Mary-Huard, L. Moreau, and A. Charcosset, 2019 Genomic selection efficiency and a priori estimation of accuracy in a structured dent maize panel. *Theor. Appl. Genet.* 132: 81–96.

Rutkoski J., R. P. Singh, J. Huerta-Espino, S. Bhavani, J. Poland, *et al.*, 2015 Genetic Gain from Phenotypic and Genomic Selection for Quantitative Resistance to Stem Rust of Wheat. *Plant Genome* 8.

Schnell F., and H. Utz, 1975 F1-Leistung und Elternwahl in der Züchtung von Selbstbefruchtern., pp. 243–248 in *Bericht über die Arbeitstagung der Vereinigung österreichischer Pflanzenzüchter.*, BAL Gumpenstein, Austria.

Shepherd R. K., and B. P. Kinghorn, 1998 A tactical approach to the design of crossbreeding programs, pp. 431–438 in *Armidale*.

## UCPC for optimal cross selection

- Storn R., and K. Price, 1997 Differential Evolution – A Simple and Efficient Heuristic for global Optimization over Continuous Spaces. *J. Glob. Optim.* 11: 341–359.
- Wang H., I. Misztal, I. Aguilar, A. Legarra, and W. M. Muir, 2012 Genome-wide association mapping including phenotypes from relatives without genotypes. *Genet. Res.* 94: 73–83.
- Woolliams J. A., D. P. Gwaze, T. H. Meuwissen, D. Planchenault, J. P. Renard, *et al.*, 1998 Secondary guidelines for the development of national farm animal genetic resources management plans. Management of small populations at risk
- Woolliams J. A., P. Berg, B. S. Dagnachew, and T. H. E. Meuwissen, 2015 Genetic contributions and their optimization. *J. Anim. Breed. Genet.* 132: 89–99.
- Wray N., and M. Goddard, 1994 Increasing long-term response to selection. *Genet. Sel. Evol.* 26: 431.
- Zhong S., and J.-L. Jannink, 2007 Using Quantitative Trait Loci Results to Discriminate Among Crosses on the Basis of Their Progeny Mean and Variance. *Genetics* 177: 567–576.
